# Supplementary material
Source: ML conference proceedings conference paper supplement (https://openreview.net/forum?id=j3krplz_4w6)

## A APPENDIX

### A.1 TEF OPERATION EXAMPLE

Given classifier  $F$ , input sample  $s = "a\ poignant\ comedy\ that\ offers\ food\ for\ thought\ ."$ , original attribution scores  $A(s, F, l)$ , find the adversarial sequence of tokens  $s_{adv}$  that minimizes  $PCC[A(s, F, l), A(s_{adv}, F, l)]$  such that at most  $\rho_{max} = 25\%$  of words are changed,  $\arg \max_l F(s, l) = \arg \max_l F(s_{adv}, l) = \mathbf{Pos.}$  and  $s_{adv}$  fulfills the locality constraints described in Section 3, namely each replacement is a synonym of the original word (Mrkšić et al., 2016), the replacement word needs to have the same Part Of Speech computed by SpaCy (Honnibal et al., 2020) and stop words can not be replaced.

| $w_i$  | 0   | 1        | 2      | 3    | 4      | 5    | 6    | 7       | 8   |
|--------|-----|----------|--------|------|--------|------|------|---------|-----|
| $s$    | a   | poignant | comedy | that | offers | food | for  | thought | .   |
| $A(s)$ | 0.0 | -0.08    | 0.4    | 0.05 | 0.16   | 0.23 | 0.03 | 0.22    | 0.0 |

The word importance ranking from Section 3 yields *poignant* and *comedy* (in this order) to be the  $\lfloor 9 \cdot 0.25 \rfloor = 2$  most important tokens, therefore the candidate replacements for only those are considered. This results in the following two steps of TEF.

**1. Step.** Replace the most important word *poignant* with it's best candidate, measured by lowest PCC. This candidate is the word *distressing*.

| $w_i$   | 0     | 1             | 2                        | 3    | 4      | 5    | 6     | 7       | 8    | PCC         |
|---------|-------|---------------|--------------------------|------|--------|------|-------|---------|------|-------------|
| $s'$    | a     | heartbreaking | comedy                   | that | offers | food | for   | thought | .    |             |
| $A(s')$ | 0.01  | -0.21         | 0.45                     | 0.05 | 0.18   | 0.25 | 0.04  | 0.22    | 0.01 | 0.98        |
| $s'$    | a     | distressing   | comedy                   | that | offers | food | for   | thought | .    |             |
| $A(s')$ | -0.13 | 0.15          | 1.18                     | 0.12 | -1.4   | 0.75 | -0.14 | 0.37    | 0.09 | <b>0.44</b> |
| $s'$    | a     | alarm         | comedy                   | that | offers | food | for   | thought | .    |             |
| $A(s')$ |       |               | Failed POS-Filter        |      |        |      |       |         |      | -           |
| $s'$    | a     | agonizing     | comedy                   | that | offers | food | for   | thought | .    |             |
| $A(s')$ |       |               | Failed Prediction-Filter |      |        |      |       |         |      | -           |

**2. Step.** Replace the second-most important word *comedy* with the best valid candidate, in this case the token *comic*.

| $w_i$   | 0     | 1           | 2                        | 3    | 4      | 5     | 6    | 7       | 8    | PCC         |
|---------|-------|-------------|--------------------------|------|--------|-------|------|---------|------|-------------|
| $s'$    | a     | distressing | humor                    | that | offers | food  | for  | thought | .    |             |
| $A(s')$ | -0.09 | 0.01        | 0.34                     | 0.27 | 0.2    | -0.02 | 0.02 | 0.27    | 0.05 | 0.63        |
| $s'$    | a     | distressing | comic                    | that | offers | food  | for  | thought | .    |             |
| $A(s')$ | -0.02 | 0.04        | 0.05                     | 0.02 | 0.57   | -0.13 | 0.01 | 0.46    | 0.04 | <b>0.22</b> |
| $s'$    | a     | distressing | travesty                 | that | offers | food  | for  | thought | .    |             |
| $A(s')$ |       |             | Failed Prediction-Filter |      |        |       |      |         |      | -           |
| $s'$    | a     | distressing | humorous                 | that | offers | food  | for  | thought | .    |             |
| $A(s')$ |       |             | Failed POS-Filter        |      |        |       |      |         |      | -           |

The **final adversarial sequence**  $s_{adv}$  becomes the valid  $s'$  with the lowest PCC value, which is given in the following table.

| $w_i$        | 0     | 1           | 2      | 3    | 4      | 5     | 6    | 7       | 8    | PCC         |
|--------------|-------|-------------|--------|------|--------|-------|------|---------|------|-------------|
| $s$          | a     | poignant    | comedy | that | offers | food  | for  | thought | .    |             |
| $A(s)$       | 0.0   | -0.08       | 0.4    | 0.05 | 0.16   | 0.23  | 0.03 | 0.22    | 0.0  | -           |
| $s_{adv}$    | a     | distressing | comic  | that | offers | food  | for  | thought | .    |             |
| $A(s_{adv})$ | -0.02 | 0.04        | 0.05   | 0.02 | 0.57   | -0.13 | 0.01 | 0.46    | 0.04 | <b>0.22</b> |

## A.2 ROBUSTNESS OF EXPLANATIONS

## A.2.1 AG's NEWS

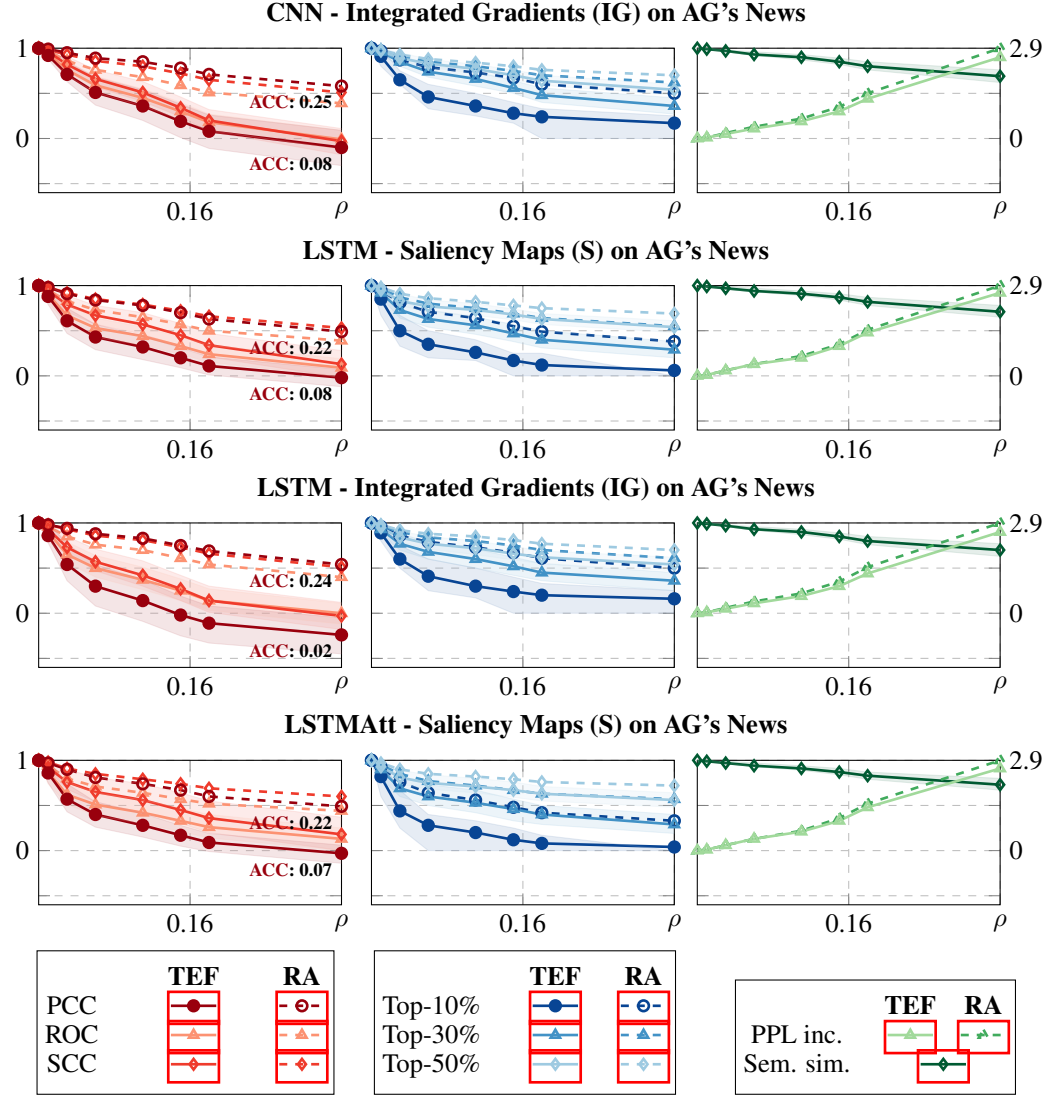

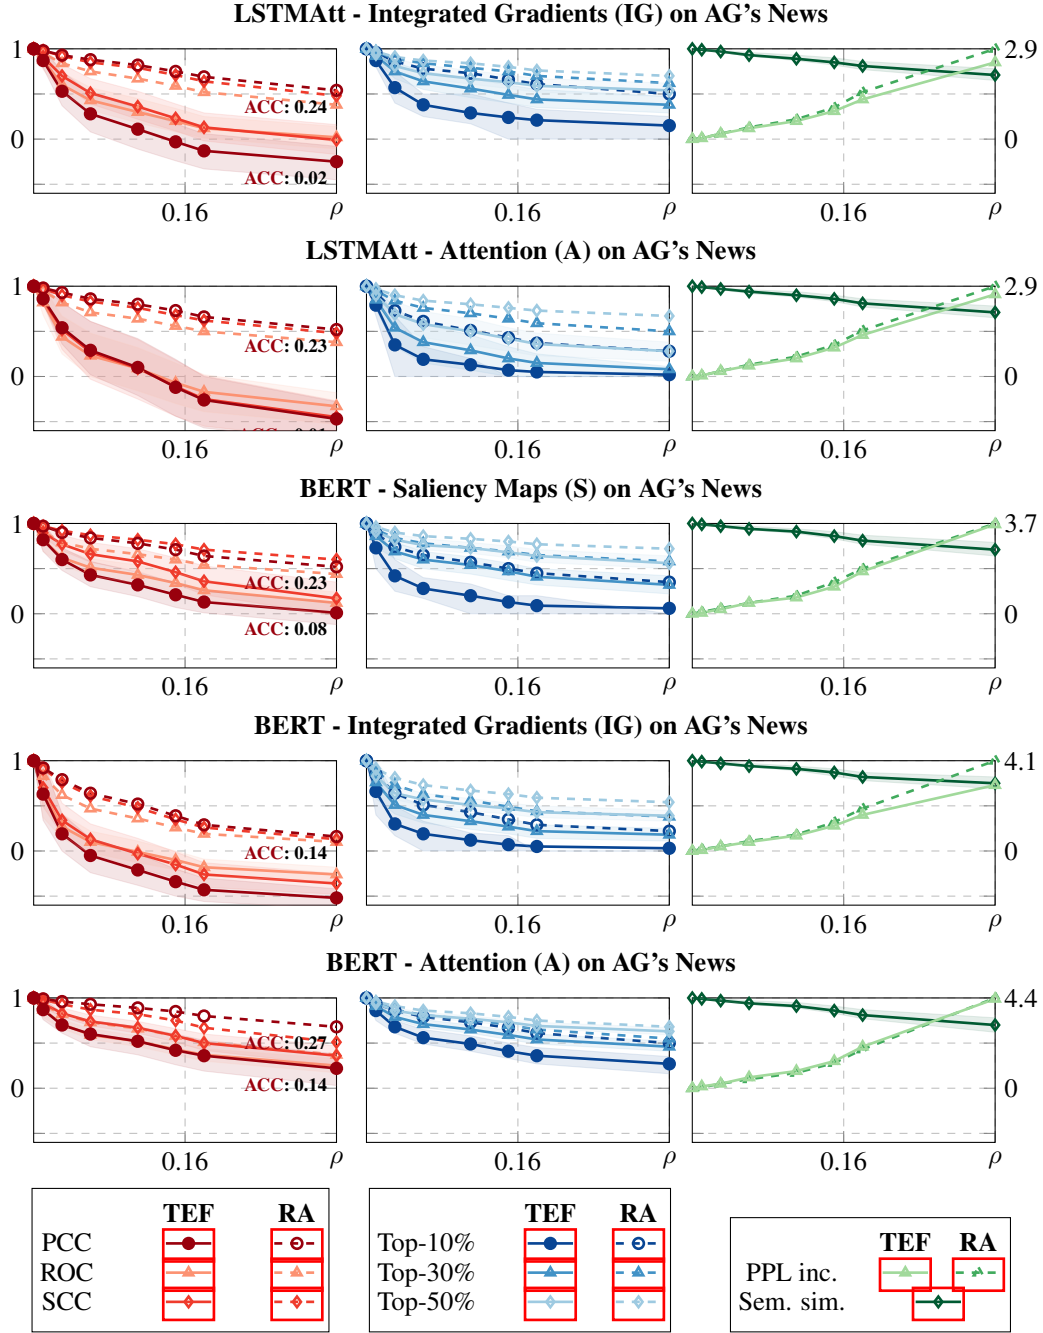

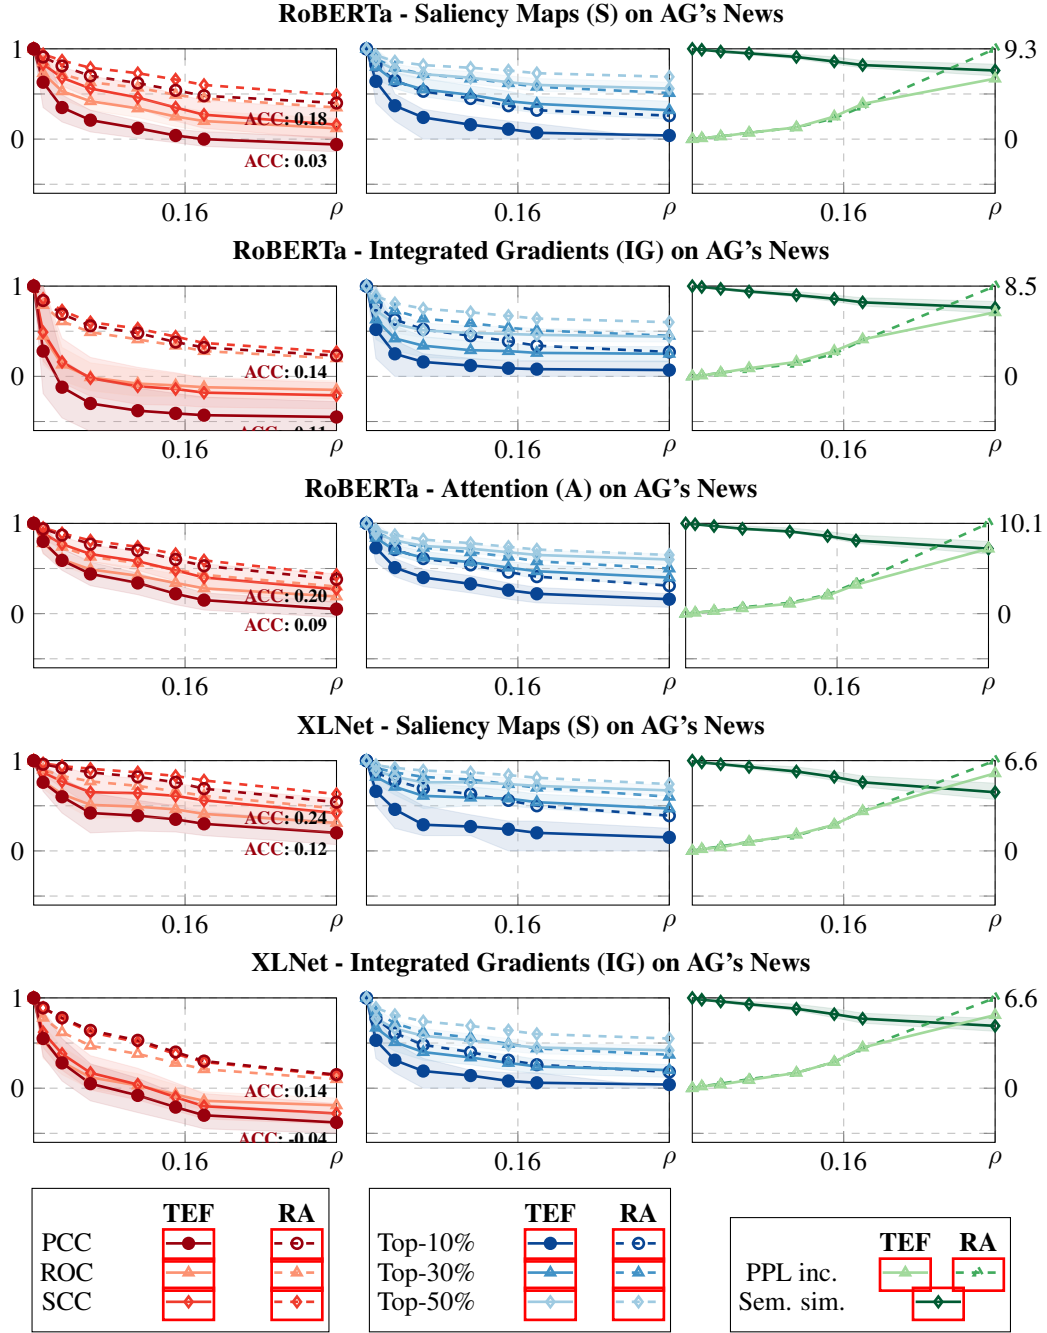

**XLNet - Attention (A) on AG's News**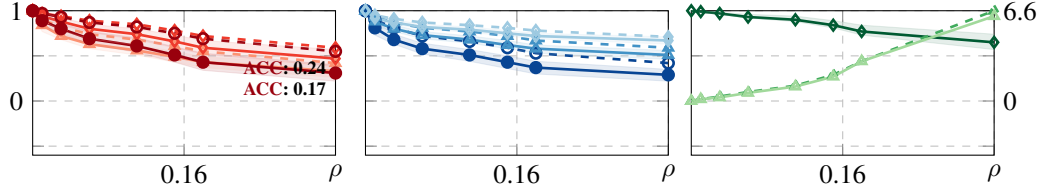**A.2.2 MR****CNN - Saliency Maps (S) on MR**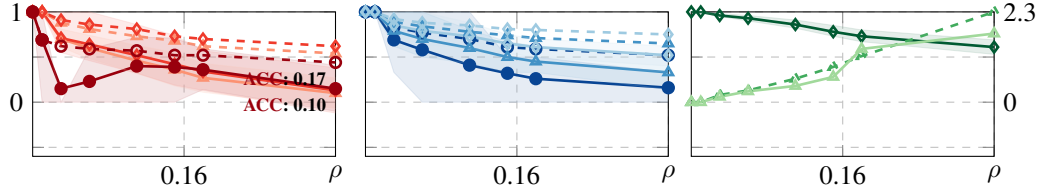**CNN - Integrated Gradients (IG) on MR**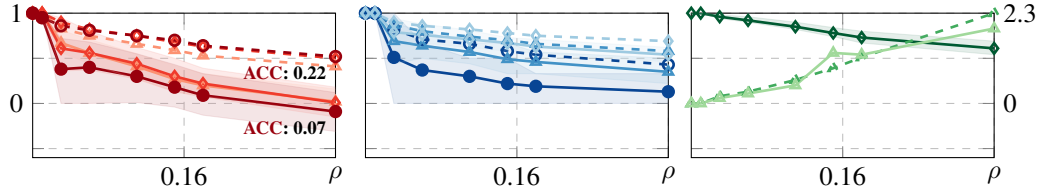**LSTM - Saliency Maps (S) on MR**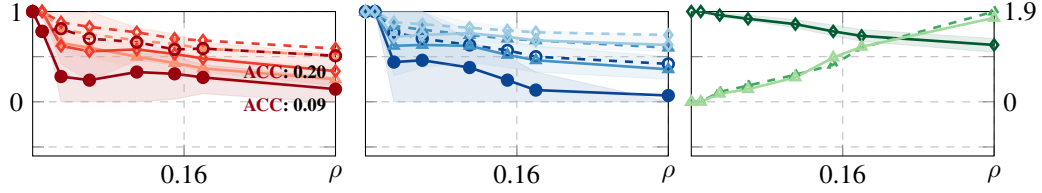**LSTM - Integrated Gradients (IG) on MR**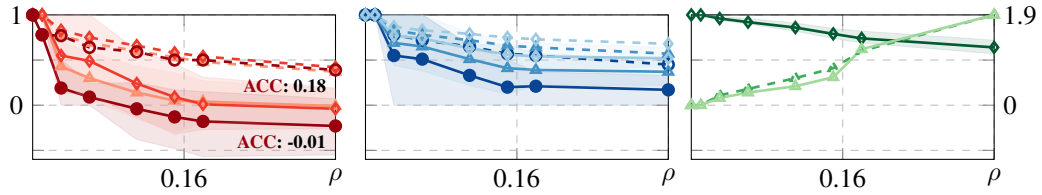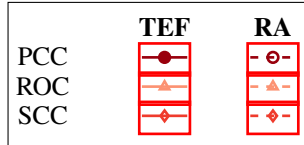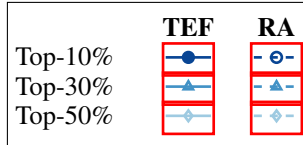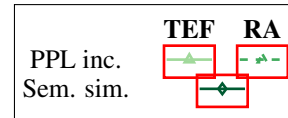

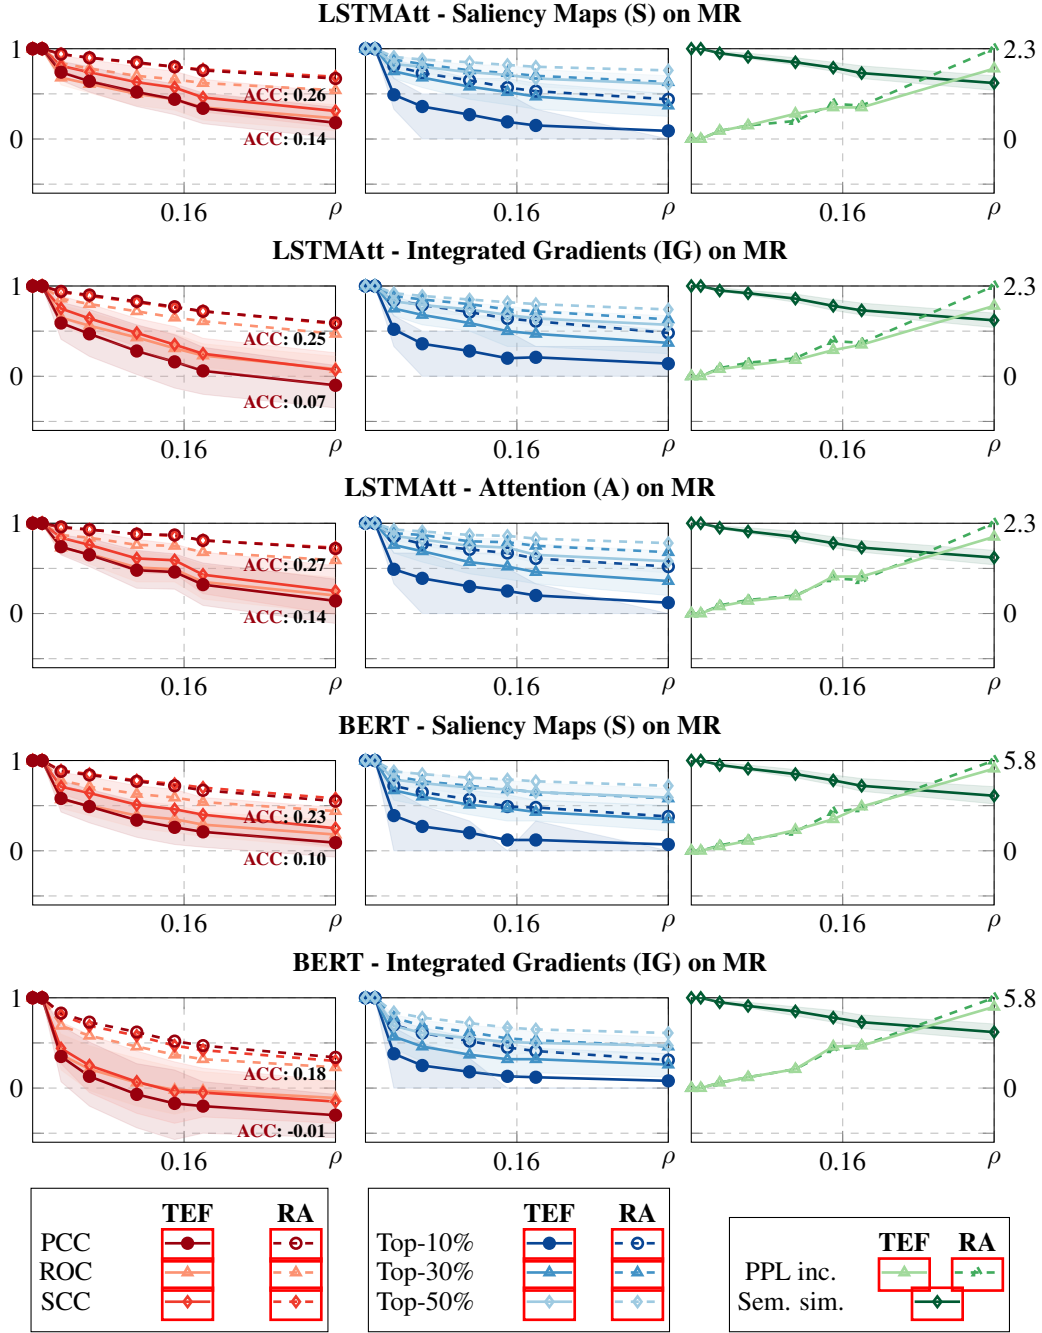

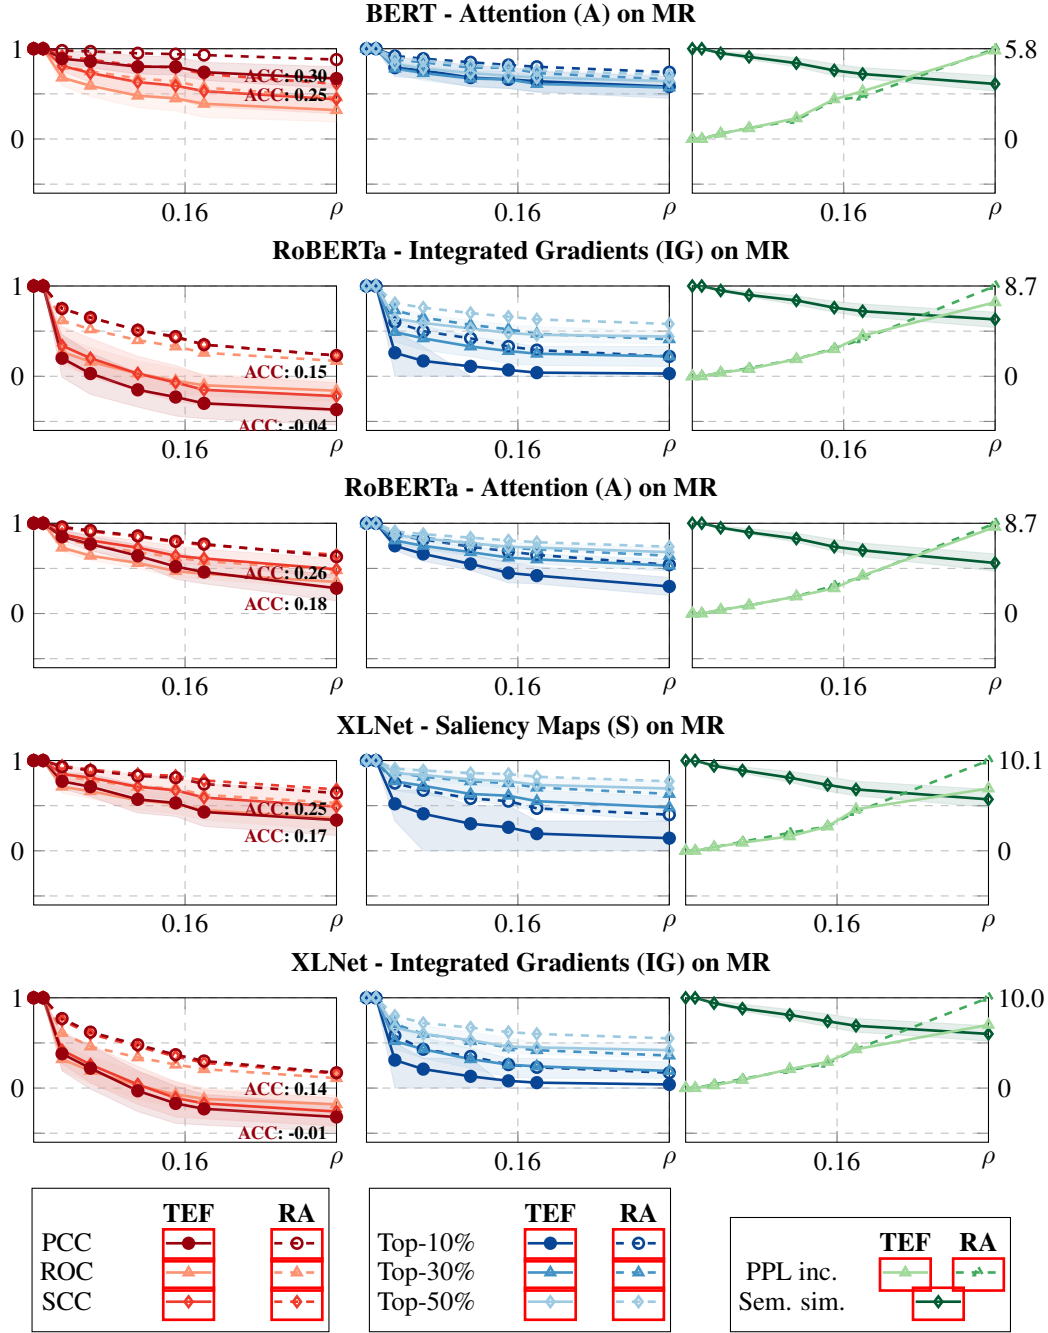

**XLNet - Attention (A) on MR**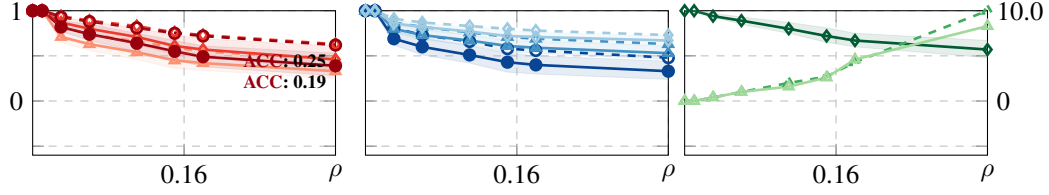**A.2.3 IMDB****CNN - Saliency Maps (S) on IMDB**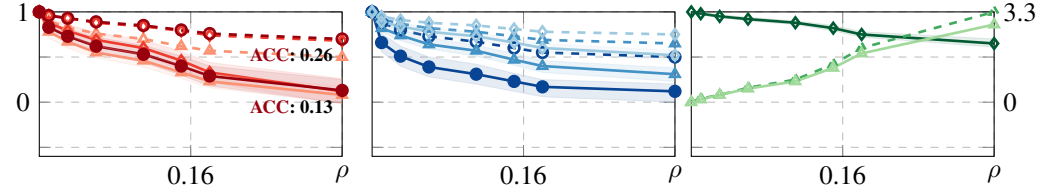**CNN - Integrated Gradients (IG) on IMDB**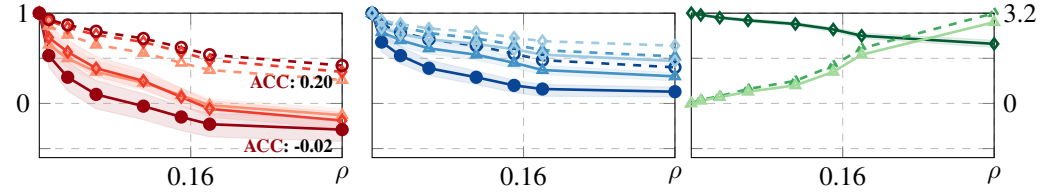**LSTM - Saliency Maps (S) on IMDB**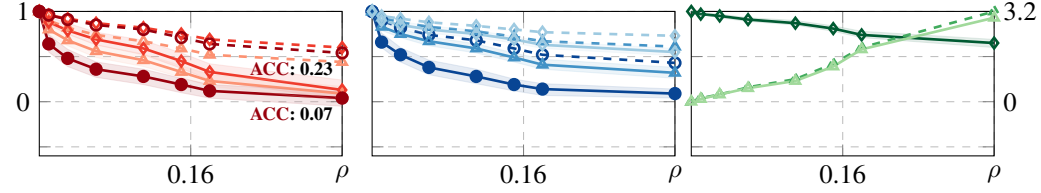**LSTM - Integrated Gradients (IG) on IMDB**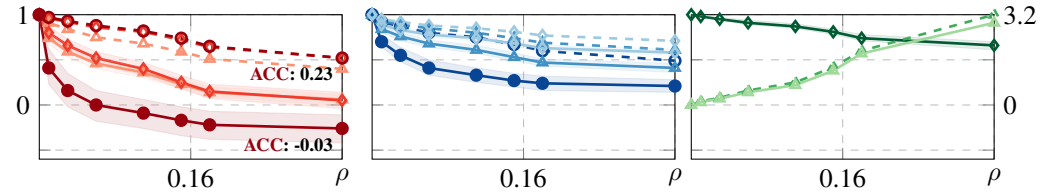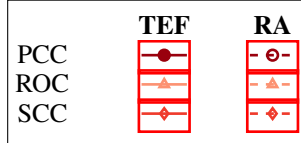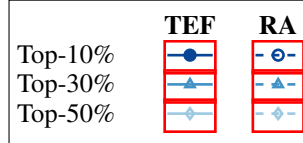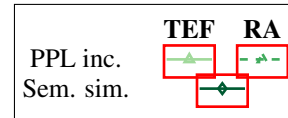



### LSTMAtt - Saliency Maps (S) on IMDB

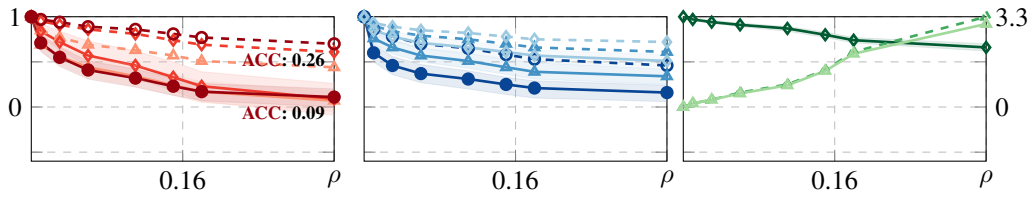

### LSTMAtt - Integrated Gradients (IG) on IMDB

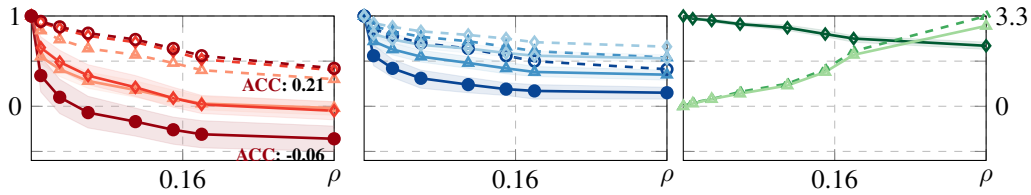

### BERT - Saliency Maps (S) on IMDB

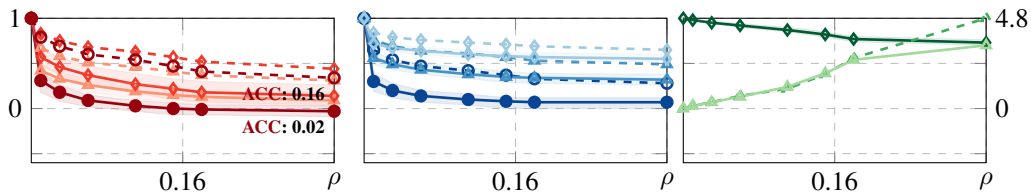

## BERT - Integrated Gradients (IG) on IMDB

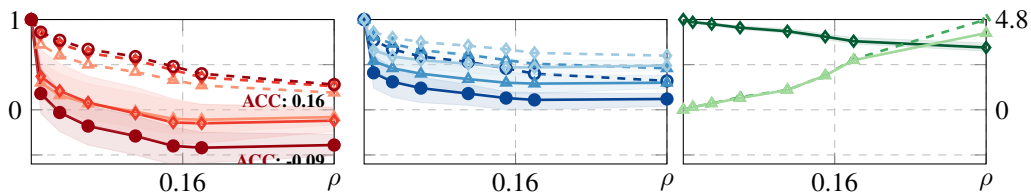

### BERT - Attention (A) on IMDB

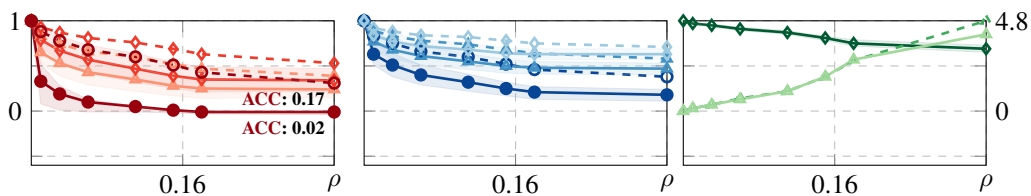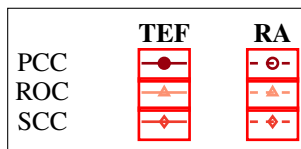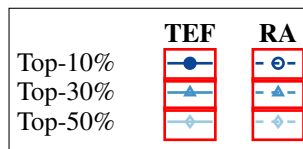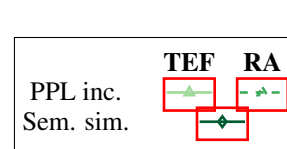

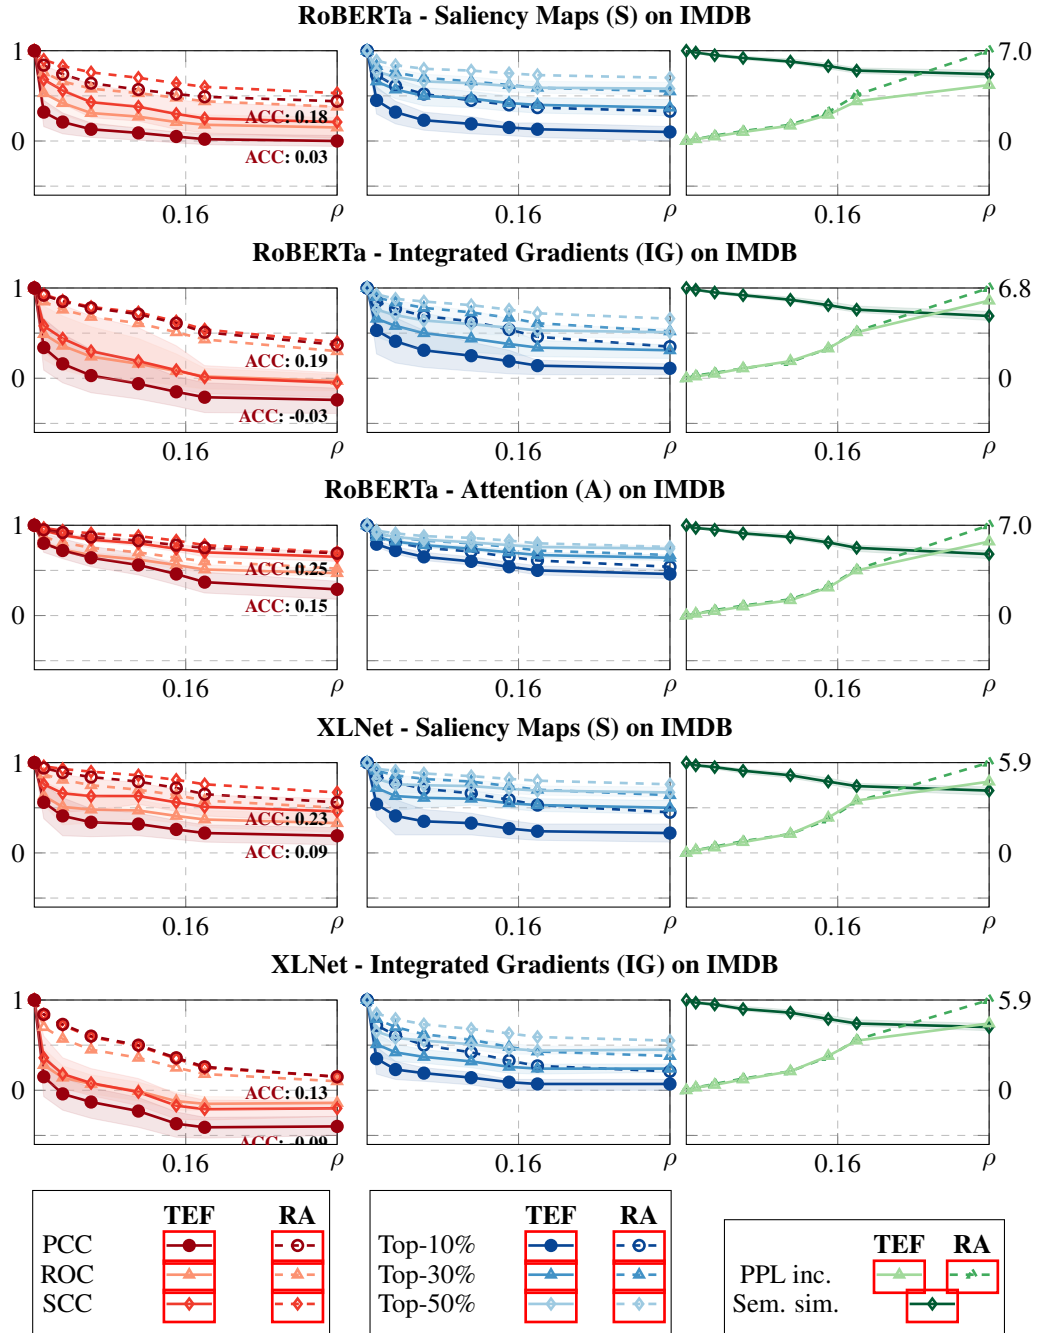

**XLNet - Attention (A) on IMDB**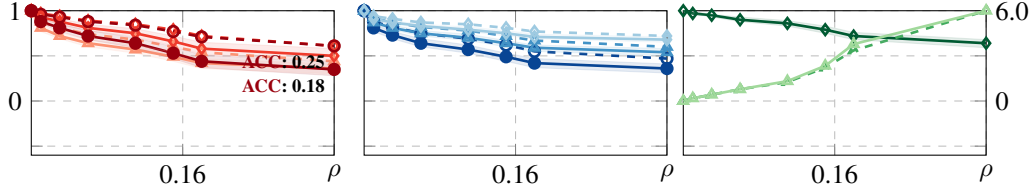**A.2.4 YELP****CNN - Saliency Maps (S) on Yelp**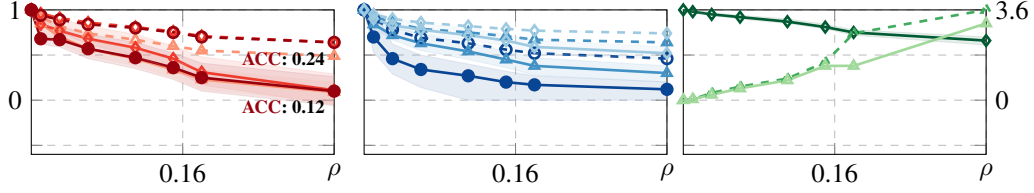**CNN - Integrated Gradients (IG) on Yelp**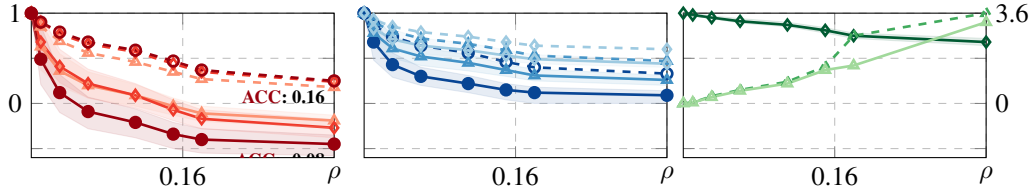**LSTM - Saliency Maps (S) on Yelp**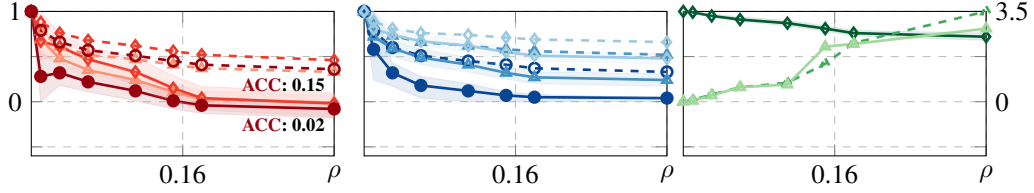**LSTM - Integrated Gradients (IG) on Yelp**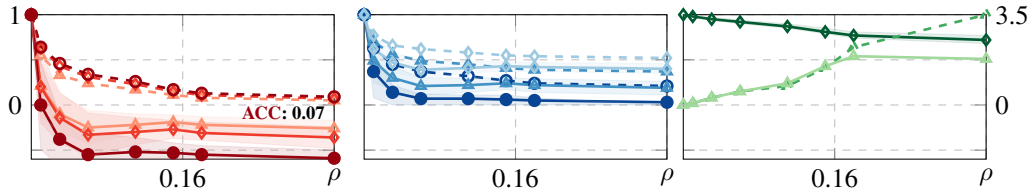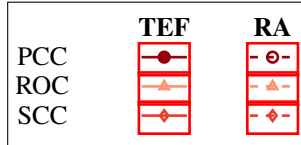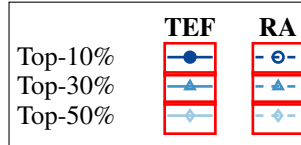

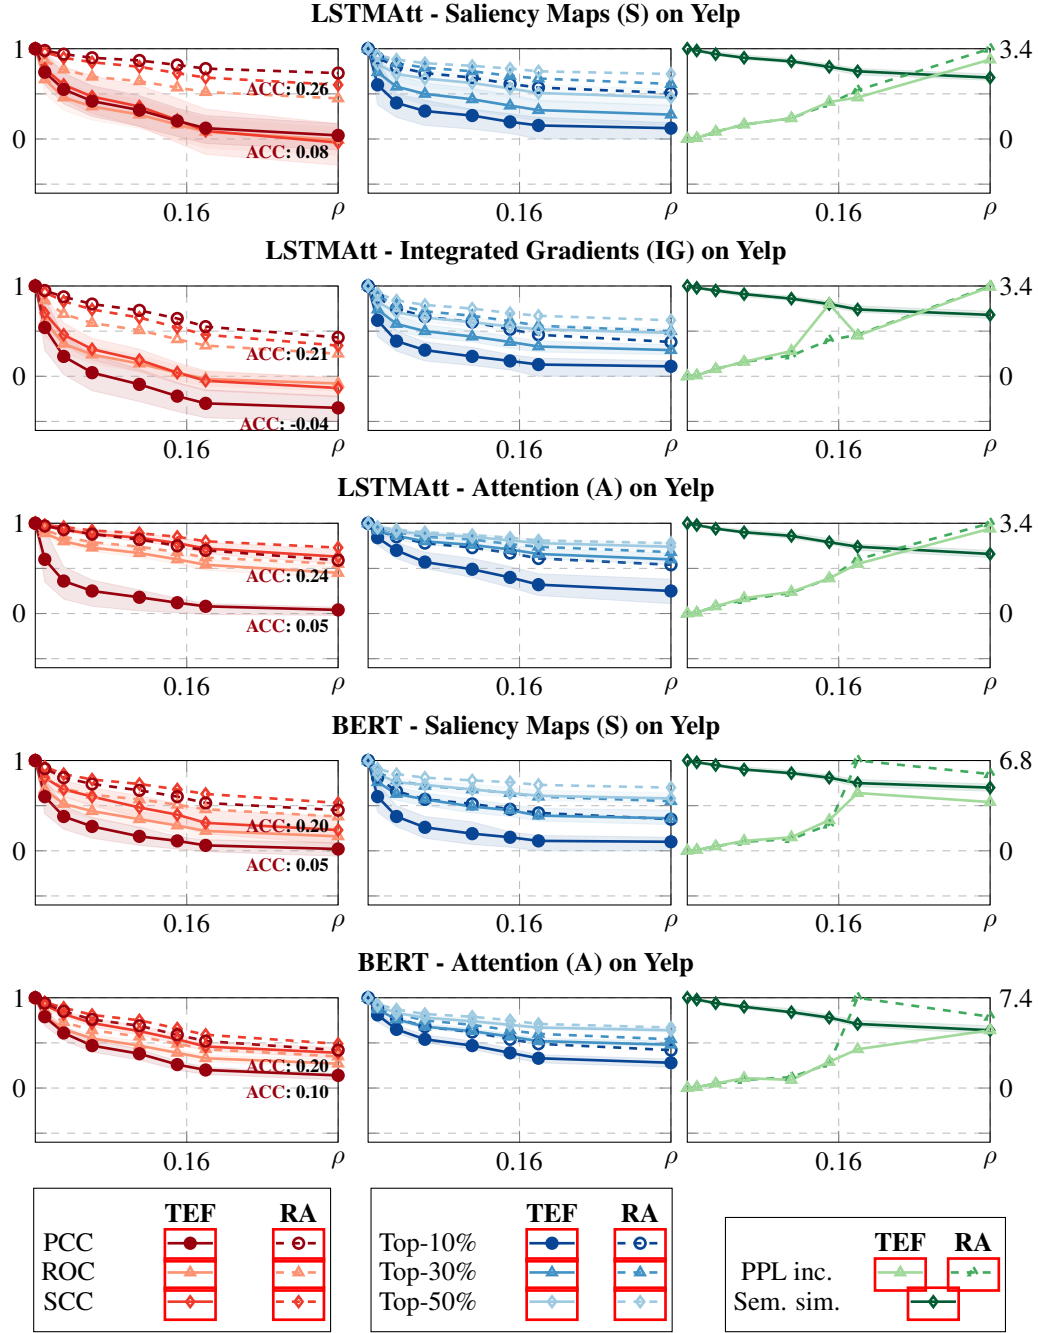

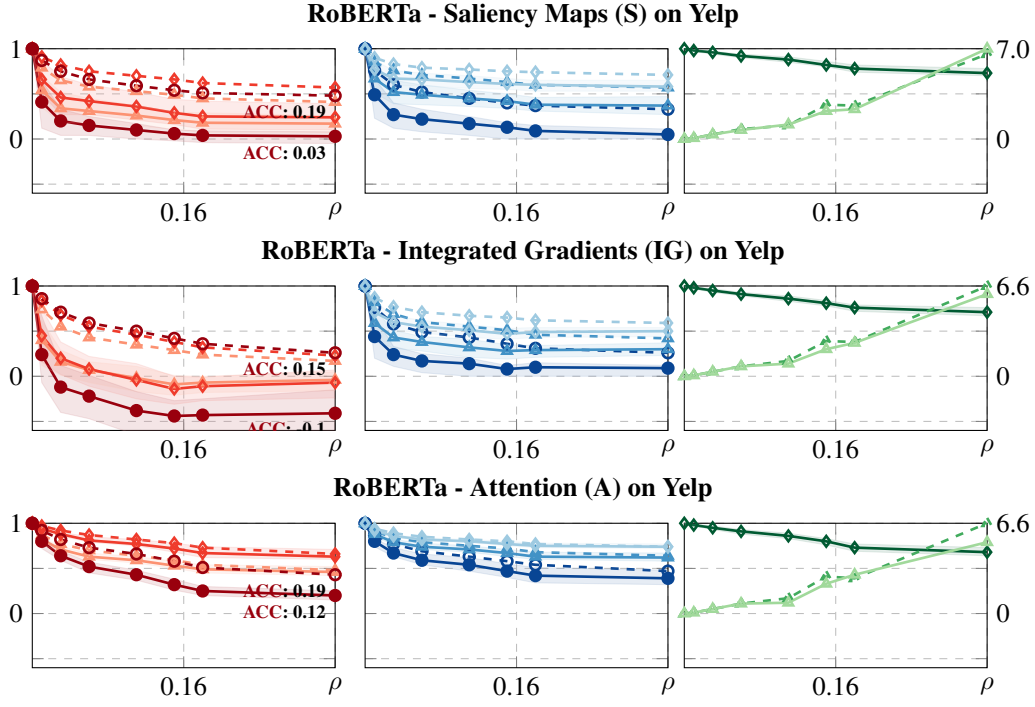

## A.2.5 FAKE NEWS

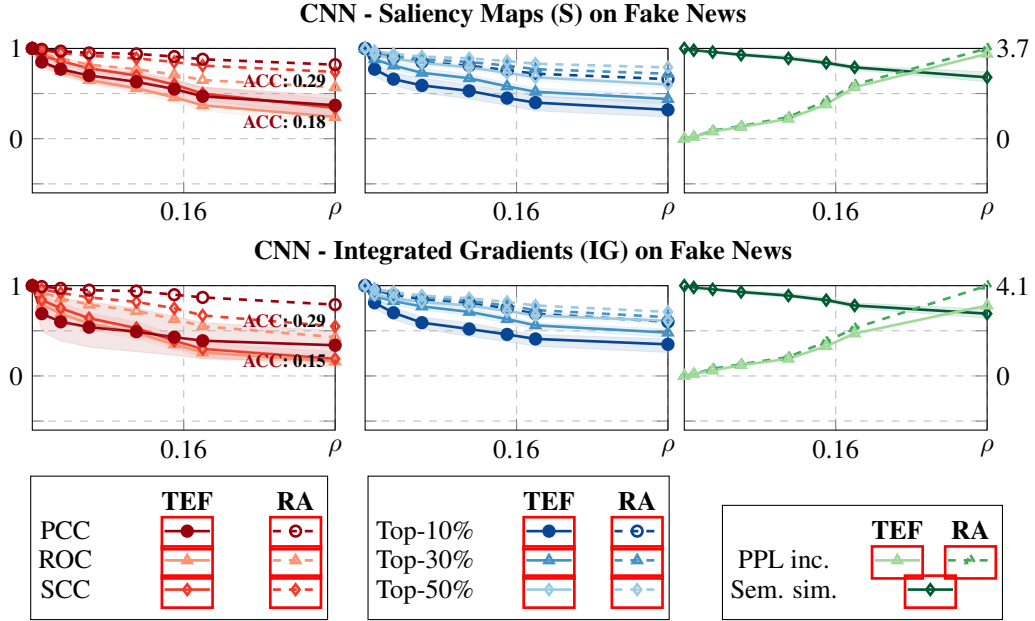

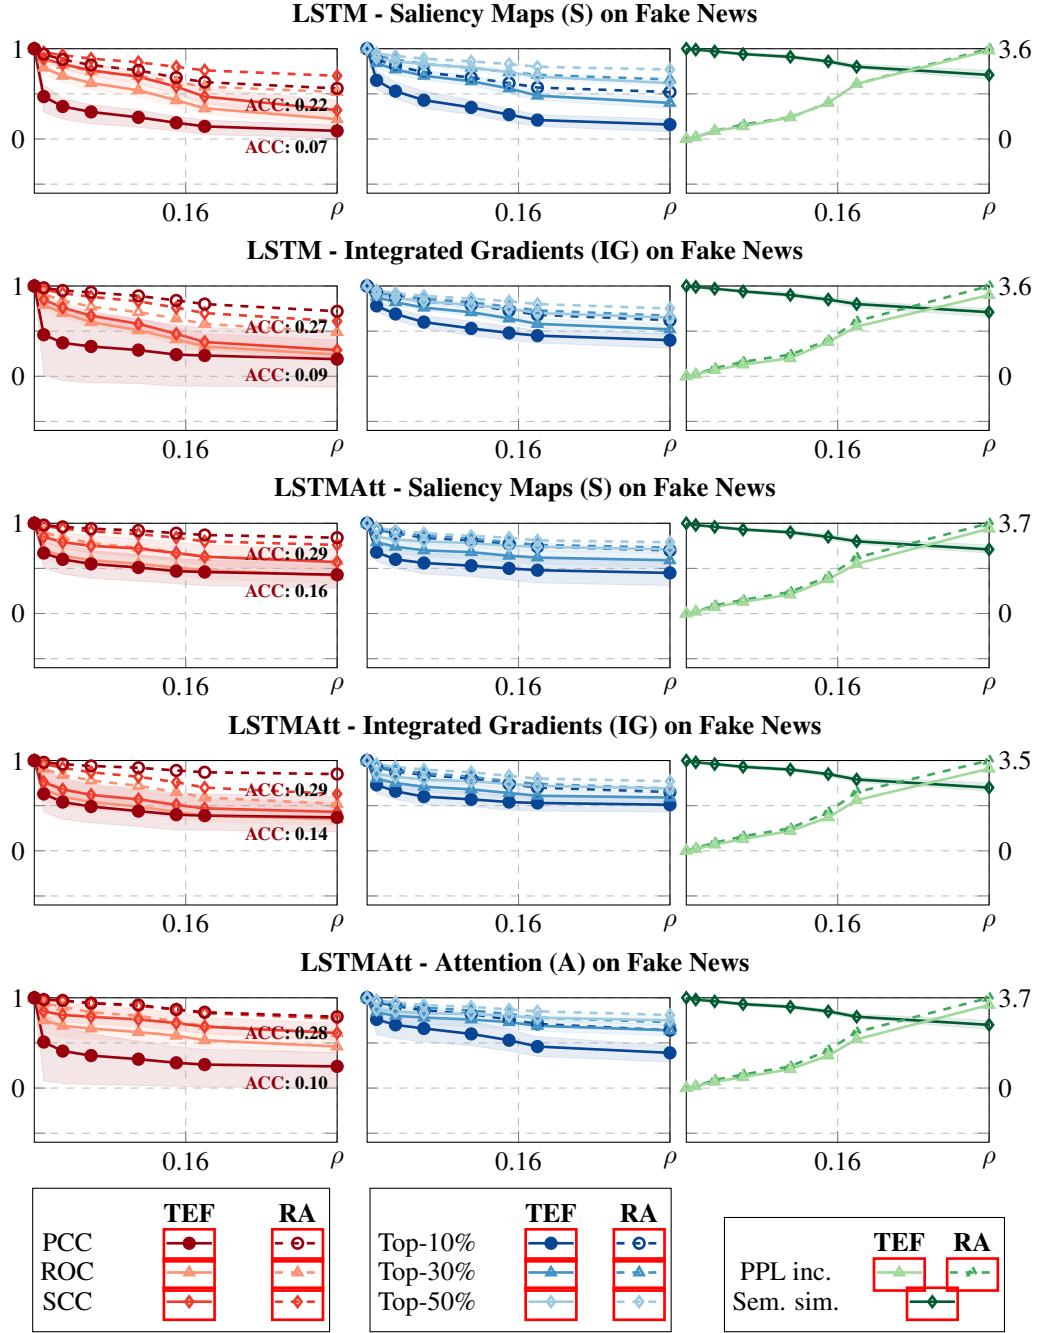

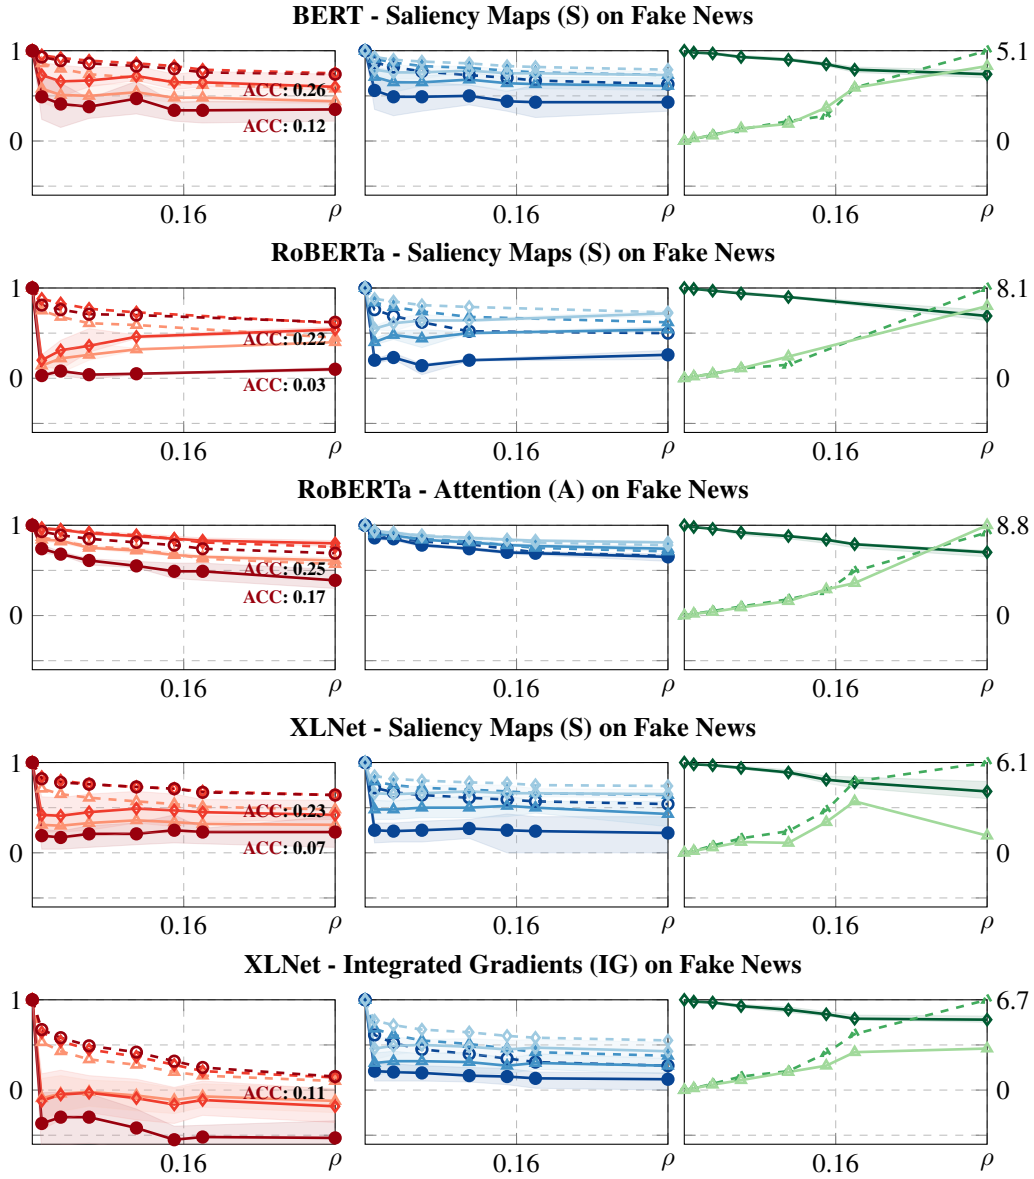

Supplement: supplementary_material [file attachment]
